# Supplementary material for: Source and dynamics of a volcanic caldera unrest: Campi Flegrei, 1983–84
Source: PubMed Central journal article supplement (PMC5556014; doi:10.1038/s41598-017-08192-7), 2017-08-14
Supplement: 41598_2017_8192_MOESM2_ESM.pdf [file 41598_2017_8192_MOESM2_ESM.pdf]

1 Source and dynamics of a volcanic caldera unrest: Campi Flegrei, 1983-84

2  
3 **Luca De Siena<sup>1\*</sup>, Giovanni Chiodini<sup>2</sup>, Giuseppe Vilardo<sup>3</sup>, Edoardo Del Pezzo<sup>3,4</sup>, Mario Castellano<sup>3</sup>**  
4 **Simona Colombelli<sup>5</sup>, Nicola Tisato<sup>6</sup>, Guido Ventura<sup>7,8</sup>**

5  
6 <sup>1</sup> *University of Aberdeen, School of Geosciences, Dept. Geology and Petroleum Geology, Meston*  
7 *Building, King's College, Aberdeen AB24 3UE Scotland, UK*

8 <sup>2</sup> *Istituto Nazionale di Geofisica e Vulcanologia, Sezione di Bologna, Via D. Creti 12, 40128 Bologna,*  
9 *Italy*

10 <sup>3</sup> *Istituto Nazionale di Geofisica e Vulcanologia, Sezione di Napoli-Osservatorio Vesuviano, Via*  
11 *Diocleziano 328, 80124 Napoli, Italy*

12 <sup>4</sup> *Instituto Andaluz de Geofisica, Universidad de Granada, Calle Prof. Clavera, Campus Universitario*  
13 *de Cartuja, Granada, Spain*

14 <sup>5</sup> *Dept. of Physics, University of Naples Federico II, Napoli, Italy*

15 <sup>6</sup> *The University of Texas at Austin, Jackson School of Geosciences, Department of Geological Sciences,*  
16 *2275 Speedway Stop C9000, Austin, TX 78712*

17 <sup>7</sup> *Istituto Nazionale di Geofisica e Vulcanologia, Sezione di Roma, Via di Vigna Murata 605, 00181*  
18 *Roma, Italy*

19 <sup>8</sup> *Istituto per l'Ambiente Marino Costiero, CNR, Napoli, Italy*

20  
21 **Supplementary Materials**

22

01/04/1984

Depth

● < 2.2 km

● > 2.2 km

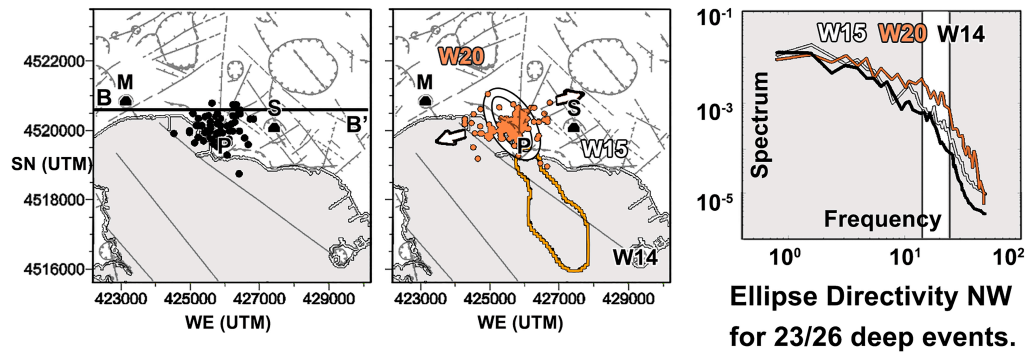

23 **Supplemental Figure 1. April 1 1984 seismic cluster and NW directivity.** Shallow (black circles) and  
24 deep (orange circles) microearthquakes recorded on April 1. Three seismic stations are used to study the  
25 directivity of the deep April 1 cluster: W20 (orange), W15 (white) and W14 (black). The strike of the  
26 fault is NW-SE, hence we assume the rupture is produced at the NW end of the fault just offshore  
27 Pozzuoli, as also deduced by the study of the focal mechanisms of the corresponding earthquakes (De  
28 Natale et al 1995). Arrows show the aperture of the rupture below the caprock (compare with video  
29 SV1) during the day. The stacked average seismic spectra are shown on the right. The frequency band  
30 chosen for the analysis is shown in white. The average spectra have been obtained by using Matlab  
31 R2014b © ([https://uk.mathworks.com/campaigns/products/ppc/google/matlab-trial-](https://uk.mathworks.com/campaigns/products/ppc/google/matlab-trial-request.html?s_eid=ppc_29742998122&q=matlab)  
32 [request.html?s\\_eid=ppc\\_29742998122&q=matlab](https://uk.mathworks.com/campaigns/products/ppc/google/matlab-trial-request.html?s_eid=ppc_29742998122&q=matlab)). Maps created with Voxler 3.0  
33 (<http://www.goldensoftware.com/products/voxler>). Layout and axes created with Photoshop CS6 ©  
34 (<http://www.adobe.com/products/photoshop.html>).

35  
36  
37  
38  
39  
40  
41  
42





44 **Supplemental Figure 2. Comparison between previous and new inversions.**

45 a) Comparison between rays crossing the 4-4.5 km deep layer. Inside the grid offshore Pozzuoli we  
46 show the number of rays crossing the aseismic area in the two studies. The high attenuation anomaly  
47 only appears in the present work, while no relevant anomaly was present in the previous study at these  
48 depths. The grid shows the 24 cells comprised in the aseismic area, where the inversions have been  
49 performed in the two studies. This grid has been plotted in Matlab R2014b©  
50 ([https://uk.mathworks.com/campaigns/products/ppc/google/matlab-trial-](https://uk.mathworks.com/campaigns/products/ppc/google/matlab-trial-request.html?s_eid=ppc_29742998122&q=matlab)  
51 [request.html?s\\_eid=ppc\\_29742998122&q=matlab](https://uk.mathworks.com/campaigns/products/ppc/google/matlab-trial-request.html?s_eid=ppc_29742998122&q=matlab)) and imposed on the geomorphological map. The  
52 total number of rays shown on the grid is the sum of all the rays crossing the grid for the two studies.  
53 ESRI ArcGIS 10.0 ([https://www.esri.com/training/catalog/5763042b851d31e02a43ed4d/using-arcmap-](https://www.esri.com/training/catalog/5763042b851d31e02a43ed4d/using-arcmap-in-arcgis-desktop-10/)  
54 [in-arcgis-desktop-10/](https://www.esri.com/training/catalog/5763042b851d31e02a43ed4d/using-arcmap-in-arcgis-desktop-10/)) was used to obtain geomorphological results shown. Both the grid and the  
55 numbers have been imposed on the panels using Photoshop CS6 ©  
56 (<http://www.adobe.com/products/photoshop.html>). b) The estimate of the average quality factor is  
57 obtained by a least square inversion of all data. The first plot shows the fit of the decrease of coda-  
58 normalized energies (cyan circles) with increasing travel time (red line). Green and orange circles in the  
59 bottom plot show the percentage of coda-normalized energies above a threshold of 1.4, using a coda  
60 window taken between 15 s and 25 s from nucleation. c) The L-curve and damping parameter selected  
61 by using the MuRAT code for the two inversions. The plots in panels b) and c) are two outputs of the  
62 MuRAT code, a free code working in Matlab R2014b©, available at  
63 <https://github.com/LucaDeSiena/MuRAT>.

64

65

66

67

68

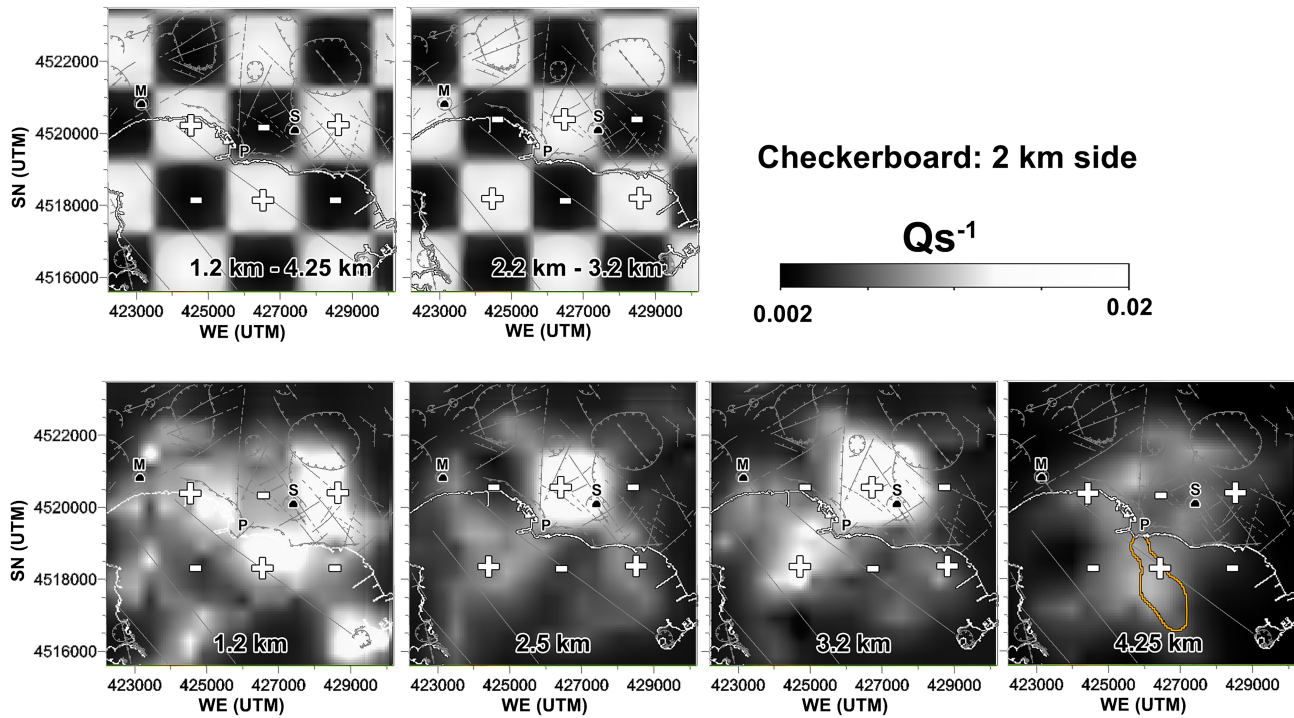

69

70 **Supplemental Figure 3. Checkerboard test**

71 The checkerboard anomalies are created using the MuRATcode

72 (<https://github.com/LucaDeSiena/MuRAT>) and plotted using Voxler 3.0

73 (<http://www.goldensoftware.com/products/voxler>). Symbols and layout of the figure were created using

74 Photoshop CS6 © (<http://www.adobe.com/products/photoshop.html>). The interpolation is the same used

75 in Figs. 3-5.

76

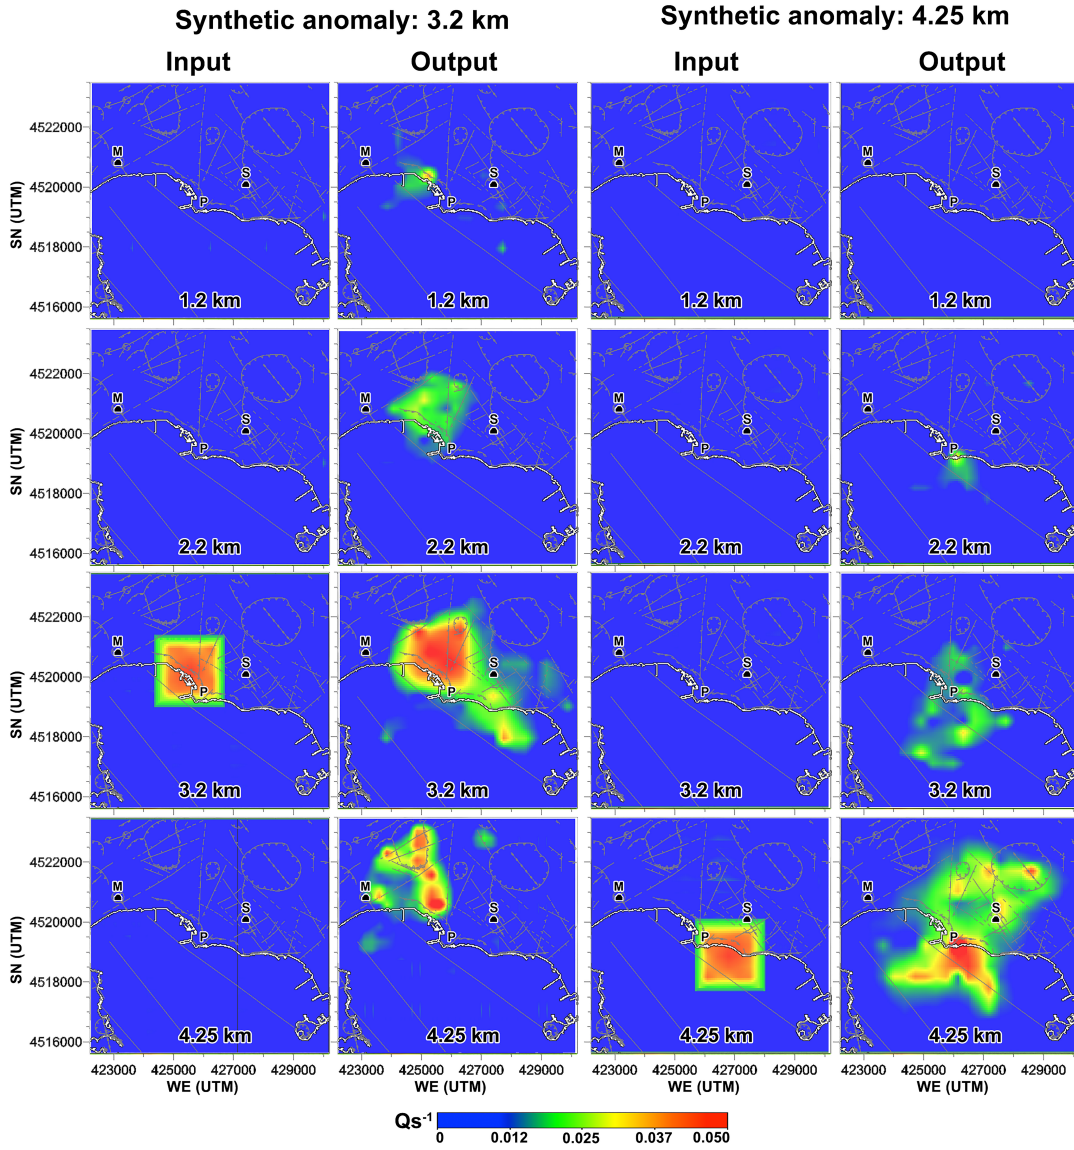

78 **Supplemental Figure 4. Synthetic anomaly tests**

79 The results of 2 spike tests, performed to check the effective recovery of (1) the 3.2 km deep anomaly,  
 80 interpreted as the a high-attenuation supercritical fluid reservoir, and (2) the 4.25 anomaly interpreted a  
 81 high-attenuation feeder. The synthetic anomalies are created with the MuRAT code  
 82 (<https://github.com/LucaDeSiena/MuRAT>) and plotted using Voxler 3.0  
 83 (<http://www.goldensoftware.com/products/voxler>). Symbols and layout of the figure were created using  
 84 Photoshop CS6 © (<http://www.adobe.com/products/photoshop.html>). The interpolation is the same used  
 85 in Figs. 3-5.

Testing the existence of a layer of  $Q_s^{-1}=0.004$  at -2.5 km depth in between structures at  $Q_s^{-1}=0.02$

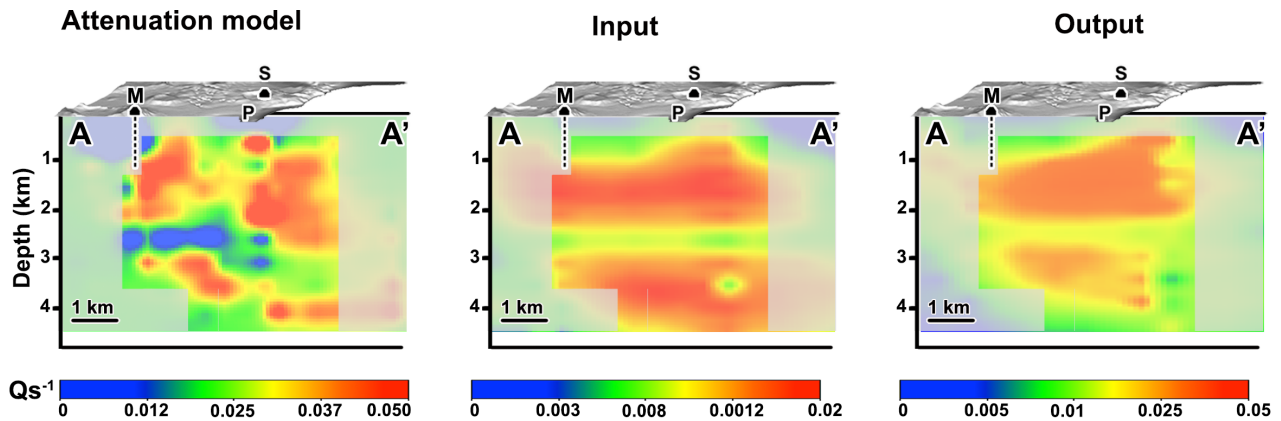

Checkerboard tests for the vertical slices AA' and BB'

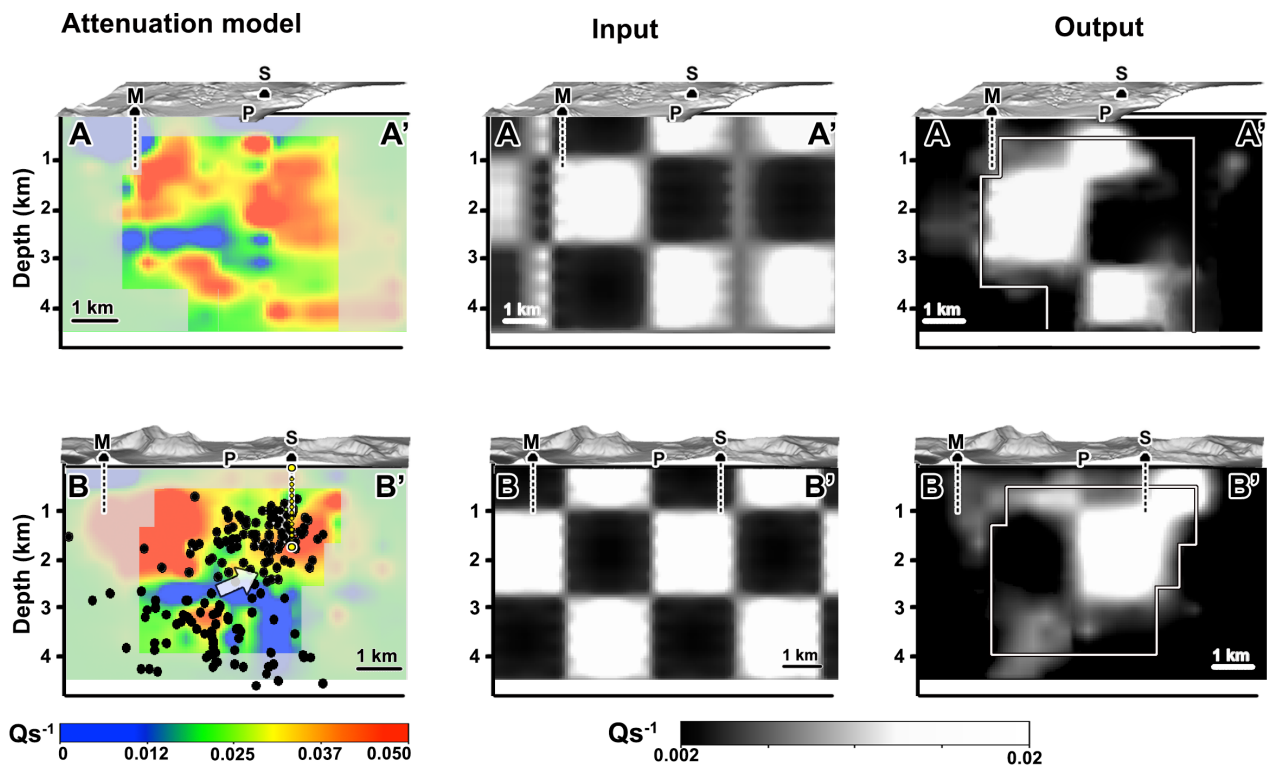

87

88 **Supplemental Figure 5. Synthetic and checkerboard tests for vertical tomograms.** The results of a  
 89 synthetic anomaly test testing the reliability of the layer of low attenuation sandwiched between 2 high  
 90 attenuation structures. The results of the checkerboard test are shown on the AA' and BB' transect. The  
 91 synthetic anomalies are created with the MuRAT code (<https://github.com/LucaDeSiena/MuRAT>) and  
 92 plotted using Voxler 3.0 (<http://www.goldensoftware.com/products/voxler>). Symbols and layout of the

93 figure were created using Photoshop CS6 © (<http://www.adobe.com/products/photoshop.html>). The  
94 interpolation is the same used in Figs. 3-5.  
95



**Pozzuoli (below caprock) -Solfatara (above caprock) paired seismic and deformation sources**

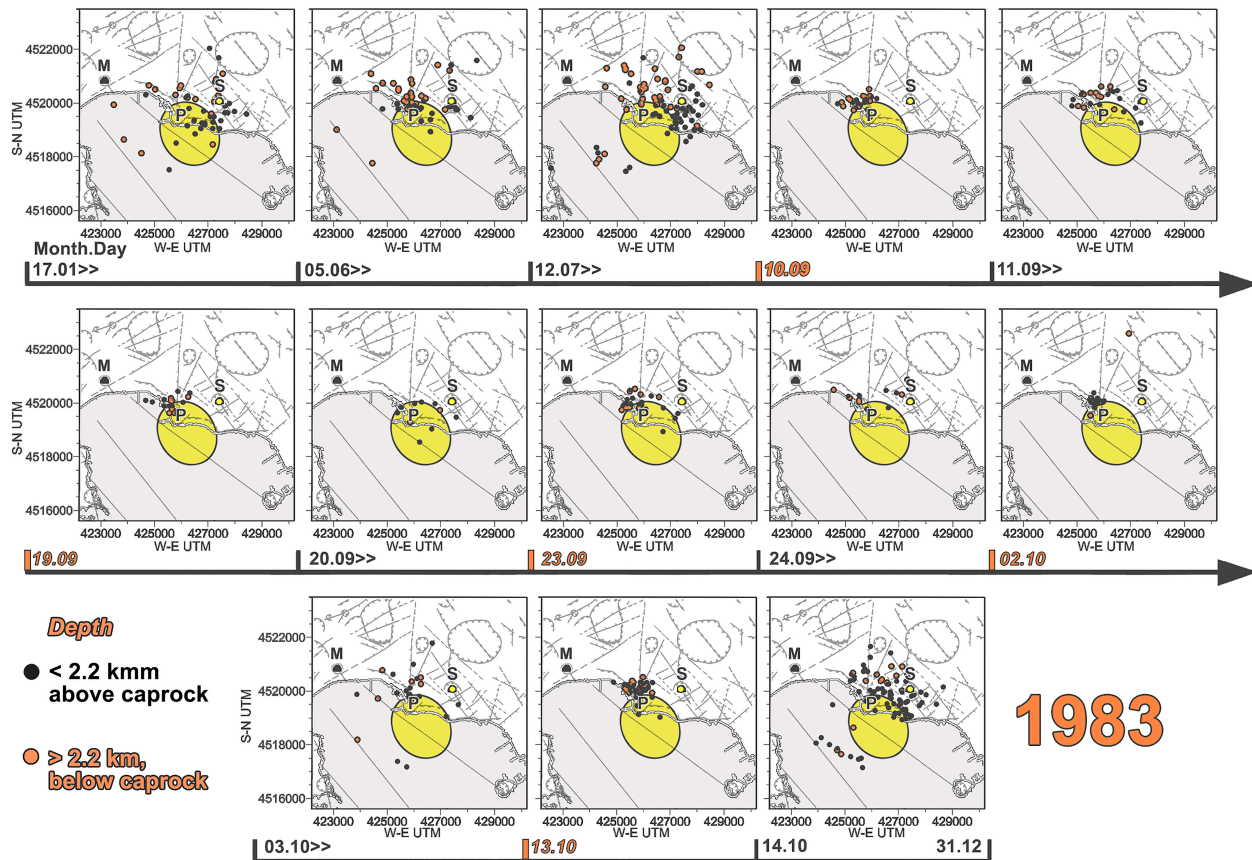

97

98 **Supplemental Figure 6. 1983 paired deformation and seismic sources.** The temporal evolution of the  
 99 seismicity is shown together with the deformation sources. The two deformation sources (yellow ellipse  
 100 and circle) are imposed on a geomorphological map on the different panels, which represent the seismic  
 101 epicentres in different time periods. The two deformation sources are drawn using the data reported in  
 102 tables 4 and 5 of Amoruso et al. 2014<sup>11</sup>. As symbols and layout, the deformation sources are created in  
 103 Photoshop CS6 © (<http://www.adobe.com/products/photoshop.html>). ESRI ArcGIS 10.0  
 104 (<https://www.esri.com/training/catalog/5763042b851d31e02a43ed4d/using-arcmap-in-arcgis-desktop-10/>)  
 105 was used to plot geomorphological results. Hypocentres were plotted using Voxler 3.0  
 106 (<http://www.goldensoftware.com/products/voxler>).

107

108 **Supplementary Video. Time-dependent seismicity – April 1- December 31, 1984.** Microearthquake  
109 locations in three different time periods are over-imposed on the AA' seismic attenuation transect. The  
110 background geomorphological map (left) and attenuation transect (right) are the same shown in Fig. 5b  
111 and created using the software mentioned in the corresponding caption. Hypocentres are created one by  
112 one as single PNG files and used as frames to create a MP4 video with a Matlab R2014b  
113 (<https://uk.mathworks.com/campaigns/products/ppc/google/matlab-trial51>  
114 [request.html?s\\_eid=ppc\\_29742998122&q=matlab](request.html?s_eid=ppc_29742998122&q=matlab)) self-written script. The video was imposed on the  
115 geomorphological map and attenuation transects using Premier Pro 2015.3  
116 (<https://blogs.adobe.com/creativecloud/adobe-premiere-pro-and-media-encoder-2015-3-10-4-updates/>).
